# Supplementary material for: Preterm births in China between 2012 and 2018: an observational study of more than 9 million women
Source: PubMed Central journal article supplement — Lancet Glob Health. 2021 Aug 17;9(9):e1226–41. doi: 10.1016/S2214-109X(21)00298-9 (PMC8386289; doi:10.1016/s2214-109x(21)00298-9), 2021-08-17
Supplement: mmc1.pdf [file mmc1.pdf]

# THE LANCET

## Global Health

### Supplementary appendix 1

This translation in Chinese was submitted by the authors and we reproduce it as supplied. It has not been peer reviewed. *The Lancet's* editorial processes have only been applied to the original in English, which should serve as reference for this manuscript.

此简体中文译文由作者提交，我方按照提供的版本刊登。此译文并未经过同行审阅。医学期刊《柳叶刀》的编辑流程仅适用于英文原稿，英文原稿应作为此手稿的参考。

Supplement to: Deng K, Liang J, Mu Y, et al. Preterm births in China between 2012 and 2018: an observational study of more than 9 million women. *Lancet Glob Health* 2021; **9**: e1226–41.

## 题目：中国早产发生现状：2012-2018 年全国 900 多万孕妇监测数据的研究

### 摘要

**背景：**在过去一段时期，早产的发生率在世界很多国家都呈现显著的升高趋势。但目前，中国有关早产发生率和流行现状的研究仍然很少。本研究首次利用 2012-2018 年全国危重孕产妇监测系统的数据库，全面报道了中国的早产率，并分析了近年来早产的变化趋势以及相关的危险因素。

**研究方法：**数据来源于 2012 年 1 月 1 日至 2018 年 12 月 31 日全国危重孕产妇监测系统。研究对象为至少生育 1 个活产儿（孕周 $\geq$ 28 周或出生体重 $\geq$ 1000 克）的孕妇。本研究分别对单胎和多胎妊娠孕妇中的总早产率（ $<$ 37 周）、极早产率（28-31 周）、中期早产率（32-33 周）和晚期早产率（34-36 周）等进行了估计，并分析了相应的变化趋势。研究主要采用 Logistics 回归模型分析了社会经济学因素和产科合并症与早产的关系，并采用间断时间序列模型评估了二孩政策的实施对早产发生的影响。

**主要发现：**2012-2018 年间，至少生育 1 个活产儿的孕妇累计有 9,645,646 例，其中，发生早产的孕妇有 665,244 例，早产率约 6.1%。总早产率呈现小幅增加，从 2012 年 5.9% 增加到 2018 年的 6.4%，增加约 8.8 个百分点。同期，晚期早产率和极早产率分别增加了 8.8 和 13.3 个百分点，但中期早产率没有显著增加。在单胎妊娠中，总早产率呈现小幅增加，约 6.4 个百分点。在多胎妊娠中，总早产率的增加更为明显，从 2012 年 46.8% 增加到 2018 年的 52.7%，增加约 12.4 个百分点。相较于 2012 年，2018 年的高龄产妇（ $\geq$ 35 岁；7.4% vs 15.9%）、多胎妊娠（1.6% vs 1.9%）、产检次数 7 次及以上者（50.2% vs 70.7%）、妊娠合并症者（17.9% vs 35.1%）的比例相对更高，但是，剖宫产分娩者（47.5% vs 45.0%）的比例相对更低。随着二孩政策的全面实施，中国的早产率有所增加。

**研究意义：**2012-2018 年间，中国的早产率无论在单胎和多胎妊娠中均呈现轻度上升趋势。我国政府在妇女和儿童保健方面的政策实施，对于预防早产的发生尤为重要。由于近年来社会人口学特征和产科特征的急剧变化（如高龄产妇、妊娠合并症、多胎妊娠等比例增加），特别是在二孩政策实施之后，我们需要付诸更多努力来降低早产的疾病负担。
