# Supplementary material for: Preterm births in China between 2012 and 2018: an observational study of more than 9 million women
Source: PubMed Central journal article supplement — Lancet Glob Health. 2021 Aug 17;9(9):e1226–41. doi: 10.1016/S2214-109X(21)00298-9 (PMC8386289; doi:10.1016/s2214-109x(21)00298-9), 2021-08-17
Supplement: mmc2.pdf [file mmc2.pdf]

# THE LANCET

## Global Health

### Supplementary appendix 2

This appendix formed part of the original submission and has been peer reviewed. We post it as supplied by the authors.

Supplement to: Deng K, Liang J, Mu Y, et al. Preterm births in China between 2012 and 2018: an observational study of more than 9 million women. *Lancet Glob Health* 2021; **9**: e1226–41.

**Preterm births in China between 2012 and 2018: an observational study  
of more than 9 million women**

Kui Deng<sup>1,5</sup>, Juan Liang<sup>1,5</sup>, Yi Mu<sup>1</sup>, Zheng Liu<sup>1</sup>, Yanping Wang<sup>1</sup>, Mingrong Li<sup>1</sup>, Xiaohong Li<sup>1</sup>, Li Dai<sup>1</sup>, Qi Li<sup>1</sup>, Peiran Chen<sup>1</sup>, Yanxia Xie<sup>1</sup>, Jun Zhu<sup>1,4</sup>, Hanmin Liu<sup>2,3,4,5</sup>

<sup>1</sup> National Office for Maternal and Child Health Surveillance of China, West China Second University Hospital, Sichuan University, Chengdu, Sichuan, China

<sup>2</sup> Department of Pediatrics, West China Second University Hospital, Sichuan University, Chengdu, Sichuan, China

<sup>3</sup> Med-X Center for Informatics, Sichuan University, Chengdu, Sichuan, China

<sup>4</sup> Key Laboratory of Birth Defects and Related Diseases of Women and Children (Sichuan University), Ministry of Education, Chengdu, Sichuan, China

<sup>5</sup> Key Laboratory of Chronobiology (Sichuan University), National Health Commission of China, Chengdu, Sichuan, China

# Contents

|                                                                                                                                                                                                                                                |    |
|------------------------------------------------------------------------------------------------------------------------------------------------------------------------------------------------------------------------------------------------|----|
| Appendix 1: Sampling, data quality control strategies, and statistical analysis .....                                                                                                                                                          | 2  |
| Table S1: Characteristics of hospital levels 1-3 in China.....                                                                                                                                                                                 | 6  |
| Table S2: Definitions of all variables in this analysis .....                                                                                                                                                                                  | 8  |
| Table S3: The variance inflation factor (VIF) of the independent variables of the model .....                                                                                                                                                  | 9  |
| Table S4: Models testing for goodness of fit.....                                                                                                                                                                                              | 10 |
| Table S5: Changes in maternal age, antenatal visits, multiple pregnancies, and obstetric factors associated with preterm birth in primiparous and multiparous women in China, 2012-18.....                                                     | 11 |
| Table S6: Changes in preterm birth rate, advanced maternal age ( $\geq 35$ years), and obstetric factors associated with preterm births according to frequency of antenatal visits in singleton pregnancies in China, 2012-18 .....            | 14 |
| Table S7: Changes in preterm birth rate, advanced maternal age ( $\geq 35$ years), and obstetric factors associated with preterm births according to frequency of antenatal visits in singleton primiparous pregnancies in China, 2012-18..... | 16 |
| Table S8: Changes in preterm birth rate, advanced maternal age ( $\geq 35$ years), and obstetric factors associated with preterm births according to frequency of antenatal visits in singleton multiparous pregnancies in China, 2012-18..... | 18 |
| Table S9: Changes in preterm birth rates and gestational-age-specific caesarean section rates stratified by obstetric complications in singleton pregnancies in primiparous women aged 25-29 years in China, 2012-18.....                      | 20 |
| Table S10: Changes in preterm birth rates and gestational-age-specific caesarean section rates stratified by obstetric complications in singleton pregnancies in multiparous women aged 25-29 years in China, 2012-18 .....                    | 22 |
| Table S11: Antenatal care in China .....                                                                                                                                                                                                       | 24 |
| Table S12: Maternal sociodemographic characteristics stratified by frequency of antenatal visits in all pregnancies in China, 2012-18.....                                                                                                     | 25 |

## **Appendix 1: Sampling, data quality control strategies, and statistical analysis**

### *Sampling*

China's National Maternal Near Miss Surveillance System (NMNMSS) is a facility-based surveillance system established in October 2010. The sample framework of the NMNMSS has been previously described in detail.<sup>1-3</sup> Urban districts and rural counties were based on China's National Maternal and Child Mortality Surveillance System (NMCMS). The NMCMS, a well-established population-based maternal and child death registry system, was established by the Ministry of Health of China in 1996. The NMCMS included 176 urban districts and rural counties in 1996 using stratified random sampling based on 17 socioeconomic strata across China.<sup>4</sup> With the decline in maternal and child mortality rates in recent years in China, 30 urban districts and 130 rural counties were added to the NMCMS to increase the sample size for national representation. Thus, the NMCMS covered 127 urban districts and 209 rural counties. In 2010, the NMNMSS included 326 urban districts and rural counties. Among these, 273 urban districts and rural counties were selected from the NMCMS by region strata and urban or rural characteristics. The additional 53 urban districts and rural counties that were part of the provincial Maternal and Child Mortality Surveillance System were sampled randomly within the strata to ensure proportional representation of urban and rural populations across all three regions (eastern, central, and western) in China. A map of the surveillance sites in the NMNMSS has been published in another study.<sup>3</sup> Last, according to the health facility selection criteria of WHO Global Survey for monitoring maternal and perinatal health,<sup>5</sup> once the surveillance sites were selected, two health facilities in these areas with more than 1,000 deliveries per year were randomly selected (or one facility if only one was available).

### *Data quality control strategies*

For each hospital, an associated director in the obstetric department supervised implementation of the surveillance program and ensured the completeness, accuracy, and timeliness of the data using random samples of the data-collection forms. Incomplete forms and incorrect records required immediate correction. The data could also be monitored on the online reporting system. Furthermore, four levels of quality assurance were routinely implemented to verify the quality of the records. Data quality assurance was conducted for all hospitals at the county level (twice a year) and at the municipal and provincial levels (once a year) by staff from maternal and child health care hospitals at each level. Finally, national data quality assurance was conducted by the National Office for Maternal and Child Health Surveillance through visits to six to eight randomly selected hospitals in each province once a year. All quality-control results were entered into the online reporting system, and surveillance hospitals were asked to re-examine data when errors exceeded a predefined standard (e.g., pregnancy complications if underreported by more than 5%, maternal deaths if underreported by more than 1%, and maternal near misses if underreported by more than 5%). The latest quality-control results in the online reporting system showed the individual form error rate was less than 1% at all levels.

### *Statistical analysis*

We analyzed changes in the overall and subgroup rates of preterm birth and the proportions of maternal sociodemographic and obstetric characteristics associated with preterm birth (maternal age, antenatal visits, multiple pregnancies, caesarean section, and obstetric complications) between 2012 and 2018. We first described time trends in the proportion of these factors among all pregnancies during the study period. As we supposed antenatal visits and caesarean section to be potentially modifiable factors for preterm birth, we first selected

singleton pregnancies to examine the protective effect of antenatal visits on preterm birth, considering multiple pregnancy to be a risk factor.<sup>6</sup> Due to the small numbers, women with 0-3 antenatal visits were combined into one group. We displayed time trends in the overall and subgroup rates of preterm birth and concurrent changes in the proportions of maternal factors stratified by the number of antenatal visits (0-3, 4-6,  $\geq 7$ ). Due to a possible association between caesarean section and advanced maternal age and multiple pregnancy,<sup>7-</sup><sup>9</sup> we further selected singleton pregnancies with mothers aged 25-29 years to assess the effect of the reduction in caesarean section rates on preterm birth. We displayed time trends in the overall and subgroup rates of preterm birth and concurrent trends in the caesarean section rates among women with obstetric complications.

## References

1. Mu Y, Wang X, Li X, et al. The national maternal near miss surveillance in China: A facility-based surveillance system covered 30 provinces. *Medicine* 2019; **98**(44): e17679.
2. Zhu J, Liang J, Mu Y, et al. Sociodemographic and obstetric characteristics of stillbirths in China: a census of nearly 4 million health facility births between 2012 and 2014. *The Lancet Global health* 2016; **4**(2): e109-18.
3. Liang J, Mu Y, Li X, et al. Relaxation of the one child policy and trends in caesarean section rates and birth outcomes in China between 2012 and 2016: observational study of nearly seven million health facility births. *Bmj* 2018; **360**: k817.
4. Feng XL, Guo S, Hipgrave D, et al. China's facility-based birth strategy and neonatal mortality: a population-based epidemiological study. *Lancet* 2011; **378**(9801): 1493-500.
5. Shah A, Faundes A, Machoki M, et al. Methodological considerations in implementing the WHO Global Survey for Monitoring Maternal and Perinatal Health. *Bulletin of the World Health Organization* 2008; **86**(2): 126-31.

6. Goldenberg RL, Culhane JF, Iams JD, Romero R. Epidemiology and causes of preterm birth. *Lancet* 2008; **371**(9606): 75-84.
7. Harrison MS, Garces AL, Goudar SS, et al. Cesarean birth in the Global Network for Women's and Children's Health Research: trends in utilization, risk factors, and subgroups with high cesarean birth rates. *Reproductive health* 2020; **17**(Suppl 3): 165.
8. Patel RR, Peters TJ, Murphy DJ. Prenatal risk factors for Caesarean section. Analyses of the ALSPAC cohort of 12,944 women in England. *International journal of epidemiology* 2005; **34**(2): 353-67.
9. Garen IF, Morgenstern H, Greenland S, Gifford DS. Explaining the association of maternal age with Cesarean delivery for nulliparous and parous women. *Journal of clinical epidemiology* 2003; **56**(11): 1100-10.

**Table S1: Characteristics of hospital levels 1-3 in China**

| Criteria*                          | Hospital level 1                                                                                                                          | Hospital level 2                                                                                                                                                                                                                                                                                                                     | Hospital level 3                                                                                                                                                                                                                                                                                                                                                                                         |
|------------------------------------|-------------------------------------------------------------------------------------------------------------------------------------------|--------------------------------------------------------------------------------------------------------------------------------------------------------------------------------------------------------------------------------------------------------------------------------------------------------------------------------------|----------------------------------------------------------------------------------------------------------------------------------------------------------------------------------------------------------------------------------------------------------------------------------------------------------------------------------------------------------------------------------------------------------|
| Number of beds                     | 20-99                                                                                                                                     | 100-499                                                                                                                                                                                                                                                                                                                              | ≥500                                                                                                                                                                                                                                                                                                                                                                                                     |
| Categories of clinical departments | Including at least: emergency department, internal medicine department, surgery department, gynecology department, health care department | Including at least: emergency department, internal medicine department, surgery department, gynecology department, pediatrics department, ophthalmology department, ear-nose-throat department, stomatology department, dermatological department, anesthesiology department, infectious diseases department, health care department | Including at least: emergency department, internal medicine department, surgery department, gynecology department, pediatrics department, ophthalmology department, ear-nose-throat department, stomatology department, dermatological department, anesthesiology department, infectious diseases department, traditional Chinese medicine department, rehabilitation department, health care department |
| Number of medical personnel        | At least 0.7 medical staff per bed;<br>At least one attending doctor                                                                      | At least 0.88 medical staff per bed;<br>At least 0.4 nurses per bed;<br>At least 3 deputy chief physicians;<br>At least one attending doctor in each clinical department                                                                                                                                                             | At least 1.03 medical staff per bed;<br>At least 0.4 nurses per bed;<br>At least one deputy chief physician in each clinical department;<br>At least 2 clinical nutritionists;<br>The proportion of engineering and technical personnel (technicians, assistant engineers and above) in the total number of health technical personnel shall not be less than 1%                                         |
| Size of every room                 | Floor area per bed: ≥45m <sup>2</sup>                                                                                                     | Floor area per bed: ≥45m <sup>2</sup> ;<br>Net use area per bed in ward: ≥5m <sup>2</sup> ;<br>The daily average number of outpatients accounts for the floor area of the outpatient clinic: ≥3m <sup>2</sup>                                                                                                                        | Floor area per bed: ≥45m <sup>2</sup> ;<br>Net use area per bed in ward: ≥6m <sup>2</sup> ;<br>The daily average number of outpatients accounts for the floor area of the outpatient clinic: ≥4m <sup>2</sup>                                                                                                                                                                                            |
| Type and quantity of equipment     | Basic equipment, including: electrocardiograph, breathing balloon, and other equipment related to diagnosis and treatment                 | Basic equipment, including: electrocardiograph, breathing balloon, ventilator, automatic gastric lavage machine, cardiac defibrillator, baby incubator slit lamp, dental treatment chair, multi-functional rescue bed, gastroscopy, and other equipment related to diagnosis and treatment                                           | Basic equipment, including: electrocardiograph, breathing balloon, ventilator, automatic gastric lavage machine, cardiac defibrillator, baby incubator slit lamp, dental treatment chair, multi-functional rescue bed, gastroscopy, bronchoscope, esophagoscope, high frequency electric knife, electroencephalograph, hemodialyzer, and other equipment related to diagnosis and treatment              |



\*According to the measures for the administration of the hospital grade by Ministry of Health of China.

Ref: Ministry of Health of China. The measures for the administration of the hospital grade. 1989.

<https://baike.baidu.com/item/%E5%8C%BB%E9%99%A2%E5%88%86%E7%BA%A7%E7%AE%A1%E7%90%86%E5%8A%9E%E6%B3%95/420525?fr=aladdin>. (in Chinese)

**Table S2: Definitions of all variables in this analysis**

| <b>Variables</b>       | <b>Definition</b>                                                                                            | <b>Categories</b>                                                                                                               |
|------------------------|--------------------------------------------------------------------------------------------------------------|---------------------------------------------------------------------------------------------------------------------------------|
| Preterm birth          | A delivery before 37 completed weeks of gestation according to the WHO criteria                              | Very preterm=28-31 weeks<br>Moderate preterm=32-33 weeks<br>Late preterm=34-36 weeks                                            |
| Region                 | Chinese geographical division based on sociodemographic status according to China's criteria                 | Eastern, central, western                                                                                                       |
| Hospital level         | The capability in providing health care and medical service according to China's criteria                    | Level 1, level 2, level 3                                                                                                       |
| Maternal education     | Number of years completed at school                                                                          | Illiterate=none, primary school=1-6 years, middle school=7-9 years, high school=10-12 years, college or higher= $\geq$ 13 years |
| Marital status         | Mothers' marital status                                                                                      | Married, single/widowed/divorced                                                                                                |
| Maternal age           | Age of mothers at delivery                                                                                   | <20, 20-24, 25-29, 30-34, 35-39, 40-44, 45-49 years                                                                             |
| Antenatal visits       | Frequency of medical examination and health care in hospitals during pregnancy according to China's criteria | 0, 1-3, 4-6, 7-9, $\geq$ 10                                                                                                     |
| Parity                 | Number of live births and stillbirths born before the current pregnancy                                      | Primiparous, multiparous                                                                                                        |
| Type of pregnancy      | Number of fetuses                                                                                            | Singleton, multiple                                                                                                             |
| Mode of delivery       | The mode that a fetus is delivered from the uterus                                                           | Vaginal, caesarean                                                                                                              |
| Maternal complications | Diseases occurring during pregnancy and childbirth or medical diseases before pregnancy                      | Antepartum complications, medical disease, none of the above                                                                    |

**Table S3: The variance inflation factor (VIF) of the independent variables of the model**

| Variable                      | VIF     |          |
|-------------------------------|---------|----------|
|                               | Model I | Model II |
| <b>Region</b>                 |         |          |
| East                          | 1.30    | 1.30     |
| West                          | 1.26    | 1.26     |
| <b>Maternal education</b>     |         |          |
| Illiterate                    | 1.02    | 1.02     |
| Primary school                | 1.08    | 1.08     |
| High school                   | 1.41    | 1.41     |
| College or higher             | 1.78    | 1.78     |
| <b>Marital status</b>         | 1.08    | 1.08     |
| <b>Maternal age (years)</b>   |         |          |
| <20                           | 1.16    | 1.16     |
| 20-24                         | 1.27    | 1.27     |
| 30-34                         | 1.26    | 1.27     |
| 35-39                         | 1.20    | 1.20     |
| 40-44                         | 1.05    | 1.06     |
| 45-49                         | 1.00    | 1.00     |
| <b>Antenatal visits</b>       |         |          |
| None                          | 1.03    | 1.03     |
| 1-3                           | 1.15    | 1.15     |
| 7-9                           | 1.47    | 1.47     |
| ≥10                           | 1.69    | 1.70     |
| <b>Parity</b>                 | 1.33    | 1.34     |
| <b>Type of pregnancy</b>      | 1.00    | 1.01     |
| <b>Maternal complications</b> |         |          |
| Antepartum complications      | ..      | 1.04     |
| Medical diseases              | ..      | 1.04     |
| <b>Mean VIF</b>               | 1.24    | 1.22     |

**Table S4: Models testing for goodness of fit**

| <b>Variable</b>                                                                                                                      | <b>AIC</b> |
|--------------------------------------------------------------------------------------------------------------------------------------|------------|
| Region                                                                                                                               | 4231738.4  |
| Region + Maternal education                                                                                                          | 4121661.1  |
| Region + Maternal education + Marital status                                                                                         | 4119660.6  |
| Region + Maternal education + Marital status + Maternal age                                                                          | 3940398.2  |
| Region + Maternal education + Marital status + Maternal age + Antenatal visits                                                       | 3777196.6  |
| Region + Maternal education + Marital status + Maternal age + Antenatal visits + Parity                                              | 3775393.9  |
| Region + Maternal education + Marital status + Maternal age + Antenatal visits + Parity + Type of pregnancy                          | 3583228.3  |
| Region + Maternal education + Marital status + Maternal age + Antenatal visits + Parity + Type of pregnancy + Maternal complications | 3414773.1  |

AIC= Akaike's information criterion.

**Table S5: Changes in maternal age, antenatal visits, multiple pregnancies, and obstetric factors associated with preterm birth in primiparous and multiparous women in China, 2012-18**

|                                    | Year  |       |       |       |       |       |       | Change<br>2012-2018 | p value for trend |
|------------------------------------|-------|-------|-------|-------|-------|-------|-------|---------------------|-------------------|
|                                    | 2012  | 2013  | 2014  | 2015  | 2016  | 2017  | 2018  |                     |                   |
| <b>All pregnancies (n=9645646)</b> |       |       |       |       |       |       |       |                     |                   |
| <b>Maternal age (years)</b>        |       |       |       |       |       |       |       |                     |                   |
| < 20                               | 3.1%  | 3.3%  | 2.9%  | 3.1%  | 2.3%  | 1.5%  | 1.3%  | -58.0               | <0.0001           |
| 20-24                              | 26.7% | 25.5% | 21.9% | 20.4% | 16.6% | 12.8% | 12.3% | -53.7               | <0.0001           |
| 25-29                              | 39.3% | 39.9% | 42.7% | 41.5% | 44.5% | 38.7% | 38.5% | -2.1                | <0.0001           |
| 30-34                              | 19.1% | 20.0% | 20.6% | 21.5% | 23.7% | 28.5% | 30.8% | 61.5                | <0.0001           |
| ≥ 35                               | 7.4%  | 8.2%  | 8.2%  | 10.0% | 10.6% | 16.7% | 15.9% | 113.9               | <0.0001           |
| <b>Antenatal visits</b>            |       |       |       |       |       |       |       |                     |                   |
| 0-3                                | 11.9% | 10.8% | 8.9%  | 8.3%  | 6.4%  | 5.1%  | 4.3%  | -63.6               | <0.0001           |
| 4-6                                | 35.7% | 33.9% | 31.5% | 30.8% | 28.4% | 23.7% | 21.2% | -40.5               | <0.0001           |
| ≥7                                 | 50.2% | 52.7% | 56.8% | 58.4% | 62.5% | 68.4% | 70.7% | 40.8                | <0.0001           |
| <b>Type of pregnancy</b>           |       |       |       |       |       |       |       |                     |                   |
| Singleton                          | 98.4% | 98.3% | 98.3% | 98.2% | 98.3% | 98.2% | 98.1% | -0.3                | <0.0001           |
| Multiple                           | 1.6%  | 1.7%  | 1.8%  | 1.9%  | 1.7%  | 1.8%  | 1.9%  | 17.8                | <0.0001           |
| <b>Mode of delivery</b>            |       |       |       |       |       |       |       |                     |                   |
| Vaginal                            | 52.5% | 52.1% | 54.4% | 56.2% | 57.7% | 55.7% | 55.0% | 4.9                 | <0.0001           |
| Caesarean                          | 47.5% | 47.9% | 45.6% | 43.8% | 42.3% | 44.3% | 45.0% | -5.3                | <0.0001           |
| <b>Maternal complications</b>      |       |       |       |       |       |       |       |                     |                   |
| Antepartum complications           | 14.4% | 17.1% | 18.5% | 20.0% | 20.9% | 22.3% | 23.8% | 65.5                | <0.0001           |

|                                        |       |       |       |       |       |       |       |       |         |
|----------------------------------------|-------|-------|-------|-------|-------|-------|-------|-------|---------|
| Medical diseases                       | 3.5%  | 4.7%  | 5.8%  | 7.0%  | 7.9%  | 9.5%  | 11.2% | 223.9 | <0.0001 |
| None of the above                      | 82.1% | 78.2% | 75.7% | 73.0% | 71.2% | 68.1% | 65.0% | -20.9 | <0.0001 |
| <b>Primiparous women (n= 5440535)*</b> |       |       |       |       |       |       |       |       |         |
| <b>Maternal age (years)</b>            |       |       |       |       |       |       |       |       |         |
| < 20                                   | 4.3%  | 4.7%  | 4.2%  | 4.8%  | 3.7%  | 2.7%  | 2.3%  | -46.3 | <0.0001 |
| 20-24                                  | 32.6% | 31.3% | 27.2% | 26.7% | 22.4% | 19.2% | 18.1% | -44.6 | <0.0001 |
| 25-29                                  | 42.2% | 43.1% | 47.1% | 46.2% | 52.3% | 49.3% | 48.7% | 15.5  | <0.0001 |
| 30-34                                  | 14.2% | 15.1% | 15.0% | 15.1% | 16.0% | 21.8% | 24.2% | 71.2  | <0.0001 |
| ≥ 35                                   | 2.8%  | 3.1%  | 3.1%  | 3.7%  | 3.4%  | 5.4%  | 5.5%  | 100.7 | <0.0001 |
| <b>Antenatal visits</b>                |       |       |       |       |       |       |       |       |         |
| 0-3                                    | 8.8%  | 7.8%  | 6.4%  | 6.0%  | 4.7%  | 3.8%  | 3.3%  | -62.4 | <0.0001 |
| 4-6                                    | 31.5% | 29.5% | 26.9% | 26.5% | 24.0% | 19.4% | 17.3% | -45.1 | <0.0001 |
| ≥7                                     | 57.6% | 60.1% | 63.9% | 64.9% | 68.5% | 74.0% | 76.0% | 32.0  | <0.0001 |
| <b>Type of pregnancy</b>               |       |       |       |       |       |       |       |       |         |
| Singleton                              | 98.4% | 98.2% | 98.1% | 97.9% | 98.0% | 97.8% | 97.5% | -0.8  | <0.0001 |
| Multiple                               | 1.6%  | 1.8%  | 1.9%  | 2.1%  | 2.0%  | 2.3%  | 2.5%  | 50.3  | <0.0001 |
| <b>Mode of delivery</b>                |       |       |       |       |       |       |       |       |         |
| Vaginal                                | 51.4% | 51.4% | 55.3% | 58.3% | 61.3% | 60.3% | 59.1% | 15.0  | <0.0001 |
| Caesarean                              | 48.6% | 48.6% | 44.7% | 41.7% | 38.6% | 39.7% | 40.9% | -15.8 | <0.0001 |
| <b>Maternal complications</b>          |       |       |       |       |       |       |       |       |         |
| Antepartum complications               | 15.3% | 18.2% | 20.0% | 22.1% | 23.4% | 25.6% | 27.4% | 79.4  | <0.0001 |
| Medical diseases                       | 3.7%  | 5.0%  | 6.1%  | 7.2%  | 7.9%  | 9.3%  | 10.9% | 196.2 | <0.0001 |
| None of the above                      | 81.1% | 76.9% | 73.9% | 70.8% | 68.8% | 65.2% | 61.7% | -23.9 | <0.0001 |
| <b>Multiparous women (n= 4194100)*</b> |       |       |       |       |       |       |       |       |         |

|                               |       |       |       |       |       |       |       |       |         |
|-------------------------------|-------|-------|-------|-------|-------|-------|-------|-------|---------|
| <b>Maternal age (years)</b>   |       |       |       |       |       |       |       |       |         |
| < 20                          | 0.8%  | 0.9%  | 0.9%  | 1.0%  | 0.8%  | 0.4%  | 0.4%  | -51.3 | <0.0001 |
| 20-24                         | 14.9% | 15.1% | 13.4% | 12.3% | 9.9%  | 7.1%  | 7.0%  | -53.2 | <0.0001 |
| 25-29                         | 33.9% | 34.1% | 35.6% | 35.3% | 35.6% | 29.2% | 28.9% | -14.5 | <0.0001 |
| 30-34                         | 28.6% | 28.8% | 29.5% | 29.7% | 32.5% | 34.6% | 36.9% | 28.9  | <0.0001 |
| ≥ 35                          | 16.5% | 17.3% | 16.4% | 18.0% | 18.9% | 26.8% | 25.5% | 54.5  | <0.0001 |
| <b>Antenatal visits</b>       |       |       |       |       |       |       |       |       |         |
| 0-3                           | 18.1% | 16.1% | 12.9% | 11.2% | 8.4%  | 6.2%  | 5.4%  | -70.3 | <0.0001 |
| 4-6                           | 43.9% | 41.6% | 38.8% | 36.3% | 33.4% | 27.5% | 25.1% | -42.7 | <0.0001 |
| ≥7                            | 35.9% | 39.5% | 45.4% | 50.0% | 55.5% | 63.5% | 66.3% | 84.9  | <0.0001 |
| <b>Type of pregnancy</b>      |       |       |       |       |       |       |       |       |         |
| Singleton                     | 98.4% | 98.4% | 98.4% | 98.5% | 98.6% | 98.7% | 98.6% | 0.2   | <0.0001 |
| Multiple                      | 1.6%  | 1.6%  | 1.6%  | 1.5%  | 1.4%  | 1.3%  | 1.4%  | -15.2 | <0.0001 |
| <b>Mode of delivery</b>       |       |       |       |       |       |       |       |       |         |
| Vaginal                       | 54.4% | 53.4% | 53.1% | 53.4% | 53.4% | 51.5% | 50.9% | -6.4  | <0.0001 |
| Caesarean                     | 45.6% | 46.6% | 46.9% | 46.5% | 46.5% | 48.5% | 49.1% | 7.7   | <0.0001 |
| <b>Maternal complications</b> |       |       |       |       |       |       |       |       |         |
| Antepartum complications      | 12.7% | 15.2% | 16.1% | 17.3% | 18.1% | 19.4% | 20.4% | 61.2  | <0.0001 |
| Medical diseases              | 3.0%  | 4.3%  | 5.5%  | 6.9%  | 7.9%  | 9.8%  | 11.5% | 278.6 | <0.0001 |
| None of the above             | 84.3% | 80.5% | 78.4% | 75.9% | 74.0% | 70.9% | 68.1% | -19.2 | <0.0001 |

Data are percentages of the total number of all pregnancies unless otherwise stated.

\*A total of 11,011 (0.1%) women did not report information on parity.

**Table S6: Changes in preterm birth rate, advanced maternal age ( $\geq 35$  years), and obstetric factors associated with preterm births according to frequency of antenatal visits in singleton pregnancies in China, 2012-18**

| Antenatal visits | Characteristics                                            | Year   |        |        |        |        |        |        | Change 2012-2018 | p value for trend |
|------------------|------------------------------------------------------------|--------|--------|--------|--------|--------|--------|--------|------------------|-------------------|
|                  |                                                            | 2012   | 2013   | 2014   | 2015   | 2016   | 2017   | 2018   |                  |                   |
| 0-3              | No. of deliveries                                          | 151763 | 134120 | 126269 | 103589 | 93691  | 75392  | 58160  | -61.7            | ..                |
|                  | <b>Preterm birth rate (per 100 deliveries)<sup>†</sup></b> |        |        |        |        |        |        |        |                  |                   |
|                  | Very preterm                                               | 1.2%   | 1.3%   | 1.3%   | 1.4%   | 1.5%   | 1.5%   | 1.5%   | 26.9             | <0.0001           |
|                  | Moderate preterm                                           | 1.3%   | 1.4%   | 1.4%   | 1.5%   | 1.5%   | 1.5%   | 1.5%   | 15.4             | <0.0001           |
|                  | Late preterm                                               | 5.4%   | 5.7%   | 5.8%   | 5.9%   | 6.2%   | 6.2%   | 6.1%   | 12.0             | <0.0001           |
|                  | All preterm                                                | 7.9%   | 8.4%   | 8.4%   | 8.8%   | 9.1%   | 9.2%   | 9.1%   | 14.7             | <0.0001           |
|                  | Maternal age $\geq 35$ years                               | 9.3%   | 9.9%   | 9.5%   | 10.7%  | 11.1%  | 15.3%  | 15.0%  | 61.4             | <0.0001           |
|                  | Caesarean                                                  | 39.0%  | 39.9%  | 38.7%  | 36.8%  | 35.9%  | 37.6%  | 38.1%  | -2.2             | <0.0001           |
|                  | Antepartum complications                                   | 14.2%  | 17.5%  | 19.2%  | 20.2%  | 20.7%  | 21.5%  | 22.5%  | 57.8             | <0.0001           |
| Medical diseases | 2.1%                                                       | 2.9%   | 3.6%   | 4.4%   | 5.7%   | 6.4%   | 8.1%   | 280.7  | <0.0001          |                   |
| 4-6              | No. of deliveries                                          | 454047 | 420893 | 447625 | 386557 | 416174 | 352951 | 284888 | -37.3            | ..                |
|                  | <b>Preterm birth rate (per 100 deliveries)<sup>†</sup></b> |        |        |        |        |        |        |        |                  |                   |
|                  | Very preterm                                               | 0.5%   | 0.5%   | 0.6%   | 0.7%   | 0.7%   | 0.7%   | 0.8%   | 54.9             | <0.0001           |
|                  | Moderate preterm                                           | 0.7%   | 0.7%   | 0.7%   | 0.8%   | 0.8%   | 0.8%   | 0.9%   | 20.8             | <0.0001           |
|                  | Late preterm                                               | 4.2%   | 4.1%   | 4.1%   | 4.4%   | 4.6%   | 4.7%   | 4.9%   | 16.4             | <0.0001           |
|                  | All preterm                                                | 5.4%   | 5.3%   | 5.5%   | 5.8%   | 6.1%   | 6.3%   | 6.6%   | 20.6             | <0.0001           |
|                  | Maternal age $\geq 35$ years                               | 7.4%   | 7.9%   | 7.8%   | 8.9%   | 9.4%   | 13.9%  | 13.4%  | 82.1             | <0.0001           |
|                  | Caesarean                                                  | 44.4%  | 44.8%  | 43.4%  | 41.5%  | 40.2%  | 41.5%  | 42.0%  | -5.4             | <0.0001           |
|                  | Antepartum complications                                   | 12.1%  | 14.7%  | 16.0%  | 17.3%  | 18.3%  | 19.3%  | 20.9%  | 72.5             | <0.0001           |
| Medical diseases | 2.2%                                                       | 2.7%   | 3.3%   | 4.2%   | 4.9%   | 5.8%   | 7.0%   | 223.3  | <0.0001          |                   |



|                         |                                                            |        |        |        |        |        |         |        |       |         |         |
|-------------------------|------------------------------------------------------------|--------|--------|--------|--------|--------|---------|--------|-------|---------|---------|
| $\geq 7$                | <b>No. of deliveries</b>                                   | 637869 | 652256 | 803990 | 731077 | 914444 | 1016940 | 946090 | 48.3  | ..      |         |
|                         | <b>Preterm birth rate (per 100 deliveries)<sup>†</sup></b> |        |        |        |        |        |         |        |       |         |         |
|                         | Very preterm                                               | 0.3%   | 0.4%   | 0.3%   | 0.4%   | 0.4%   | 0.4%    | 0.4%   | 0.4%  | 14.7    | <0.0001 |
|                         | Moderate preterm                                           | 0.5%   | 0.5%   | 0.5%   | 0.5%   | 0.5%   | 0.5%    | 0.5%   | 0.5%  | 10.4    | 0.0006  |
|                         | Late preterm                                               | 3.5%   | 3.5%   | 3.5%   | 3.5%   | 3.6%   | 3.7%    | 3.8%   | 3.8%  | 10.1    | <0.0001 |
|                         | All preterm                                                | 4.3%   | 4.3%   | 4.3%   | 4.4%   | 4.5%   | 4.6%    | 4.7%   | 4.7%  | 10.3    | <0.0001 |
|                         | <b>Maternal age <math>\geq 35</math> years</b>             | 6.9%   | 7.9%   | 8.0%   | 10.2%  | 11.0%  | 17.5%   | 16.4%  | 16.4% | 138.5   | <0.0001 |
|                         | <b>Caesarean</b>                                           | 50.5%  | 50.2%  | 46.4%  | 44.4%  | 42.4%  | 44.3%   | 44.8%  | 44.8% | -11.3   | <0.0001 |
|                         | <b>Antepartum complications</b>                            | 14.9%  | 17.4%  | 18.7%  | 20.2%  | 20.9%  | 22.2%   | 23.5%  | 23.5% | 57.1    | <0.0001 |
| <b>Medical diseases</b> | 4.6%                                                       | 6.3%   | 7.4%   | 8.8%   | 9.4%   | 11.0%  | 12.7%   | 12.7%  | 175.0 | <0.0001 |         |

Data are percentages of the total number of deliveries unless otherwise stated. Very preterm babies were born after 28–31 completed weeks gestation. Moderate preterm babies were born after 32–33 weeks gestation. Late preterm babies were born after 34–36 weeks gestation.

<sup>†</sup>Adjusted for the sampling distribution of the population.

**Table S7: Changes in preterm birth rate, advanced maternal age ( $\geq 35$  years), and obstetric factors associated with preterm births according to frequency of antenatal visits in singleton primiparous pregnancies in China, 2012-18**

| Antenatal visits | Characteristics                                            | Year   |        |        |        |        |        |        | Change 2012-2018 | p value for trend |
|------------------|------------------------------------------------------------|--------|--------|--------|--------|--------|--------|--------|------------------|-------------------|
|                  |                                                            | 2012   | 2013   | 2014   | 2015   | 2016   | 2017   | 2018   |                  |                   |
| 0-3              | No. of deliveries                                          | 73644  | 62117  | 55737  | 42342  | 36437  | 26607  | 21132  | -71.3            | ..                |
|                  | <b>Preterm birth rate (per 100 deliveries)<sup>†</sup></b> |        |        |        |        |        |        |        |                  |                   |
|                  | Very preterm                                               | 1.2%   | 1.4%   | 1.2%   | 1.4%   | 1.4%   | 1.6%   | 1.5%   | 26.5             | <0.0001           |
|                  | Moderate preterm                                           | 1.3%   | 1.4%   | 1.4%   | 1.6%   | 1.5%   | 1.5%   | 1.4%   | 11.6             | 0.0008            |
|                  | Late preterm                                               | 5.6%   | 5.7%   | 5.9%   | 6.1%   | 6.4%   | 6.2%   | 6.2%   | 10.4             | <0.0001           |
|                  | All preterm                                                | 8.0%   | 8.5%   | 8.5%   | 9.2%   | 9.3%   | 9.3%   | 9.1%   | 13.1             | <0.0001           |
|                  | Maternal age $\geq 35$ years                               | 2.0%   | 2.3%   | 2.3%   | 2.7%   | 2.9%   | 3.9%   | 4.1%   | 102.0            | <0.0001           |
|                  | Caesarean                                                  | 39.7%  | 40.4%  | 38.5%  | 35.2%  | 33.5%  | 34.4%  | 35.5%  | -10.7            | <0.0001           |
|                  | Antepartum complications                                   | 14.8%  | 18.4%  | 20.8%  | 22.2%  | 22.7%  | 23.5%  | 24.7%  | 66.7             | <0.0001           |
| Medical diseases | 2.0%                                                       | 2.8%   | 3.5%   | 4.4%   | 5.8%   | 6.3%   | 7.8%   | 284.7  | <0.0001          |                   |
| 4-6              | No. of deliveries                                          | 264477 | 235058 | 235035 | 187150 | 187541 | 136593 | 111163 | -58.0            | ..                |
|                  | <b>Preterm birth rate (per 100 deliveries)<sup>†</sup></b> |        |        |        |        |        |        |        |                  |                   |
|                  | Very preterm                                               | 0.5%   | 0.5%   | 0.6%   | 0.7%   | 0.7%   | 0.8%   | 0.8%   | 69.4             | <0.0001           |
|                  | Moderate preterm                                           | 0.7%   | 0.8%   | 0.7%   | 0.8%   | 0.8%   | 0.9%   | 0.9%   | 22.2             | <0.0001           |
|                  | Late preterm                                               | 4.3%   | 4.1%   | 4.2%   | 4.4%   | 4.7%   | 4.8%   | 5.0%   | 16.3             | <0.0001           |
|                  | All preterm                                                | 5.5%   | 5.4%   | 5.5%   | 5.9%   | 6.2%   | 6.4%   | 6.7%   | 21.8             | <0.0001           |
|                  | Maternal age $\geq 35$ years                               | 1.9%   | 2.1%   | 2.1%   | 2.5%   | 2.3%   | 3.5%   | 3.7%   | 89.2             | <0.0001           |
|                  | Caesarean                                                  | 45.3%  | 45.8%  | 43.1%  | 40.0%  | 37.1%  | 37.7%  | 38.4%  | -15.3            | <0.0001           |
|                  | Antepartum complications                                   | 12.9%  | 15.9%  | 17.7%  | 19.6%  | 21.0%  | 22.5%  | 24.6%  | 90.3             | <0.0001           |
| Medical diseases | 2.1%                                                       | 2.7%   | 3.3%   | 4.1%   | 4.8%   | 5.7%   | 7.0%   | 232.2  | <0.0001          |                   |

|                         |                                                            |        |        |        |        |        |        |        |         |         |  |
|-------------------------|------------------------------------------------------------|--------|--------|--------|--------|--------|--------|--------|---------|---------|--|
| $\geq 7$                | <b>No. of deliveries</b>                                   | 482614 | 476616 | 556104 | 456932 | 534808 | 518339 | 488340 | 1.2     | ..      |  |
|                         | <b>Preterm birth rate (per 100 deliveries)<sup>†</sup></b> |        |        |        |        |        |        |        |         |         |  |
|                         | Very preterm                                               | 0.3%   | 0.3%   | 0.3%   | 0.3%   | 0.3%   | 0.4%   | 0.4%   | 20.0    | <0.0001 |  |
|                         | Moderate preterm                                           | 0.4%   | 0.5%   | 0.4%   | 0.4%   | 0.4%   | 0.5%   | 0.5%   | 9.1     | <0.0001 |  |
|                         | Late preterm                                               | 3.3%   | 3.3%   | 3.3%   | 3.4%   | 3.4%   | 3.5%   | 3.6%   | 6.9     | <0.0001 |  |
|                         | All preterm                                                | 4.1%   | 4.0%   | 4.0%   | 4.1%   | 4.2%   | 4.3%   | 4.4%   | 8.2     | <0.0001 |  |
|                         | <b>Maternal age <math>\geq 35</math> years</b>             | 3.2%   | 3.6%   | 3.5%   | 4.1%   | 3.7%   | 5.7%   | 5.8%   | 81.2    | <0.0001 |  |
|                         | <b>Caesarean</b>                                           | 50.6%  | 49.9%  | 44.6%  | 41.2%  | 37.8%  | 38.6%  | 39.7%  | -21.5   | <0.0001 |  |
|                         | <b>Antepartum complications</b>                            | 15.6%  | 18.2%  | 19.9%  | 21.9%  | 23.1%  | 25.3%  | 26.7%  | 71.0    | <0.0001 |  |
| <b>Medical diseases</b> | 4.7%                                                       | 6.3%   | 7.4%   | 8.5%   | 9.0%   | 10.3%  | 11.9%  | 153.0  | <0.0001 |         |  |

Data are percentages of the total number of deliveries unless otherwise stated. Very preterm babies were born after 28–31 completed weeks gestation. Moderate preterm babies were born after 32–33 weeks gestation. Late preterm babies were born after 34–36 weeks gestation.

<sup>†</sup>Adjusted for the sampling distribution of the population.

**Table S8: Changes in preterm birth rate, advanced maternal age ( $\geq 35$  years), and obstetric factors associated with preterm births according to frequency of antenatal visits in singleton multiparous pregnancies in China, 2012-18**

| Antenatal visits | Characteristics                                            | Year   |        |        |        |        |        |        | Change 2012-2018 | p value for trend |
|------------------|------------------------------------------------------------|--------|--------|--------|--------|--------|--------|--------|------------------|-------------------|
|                  |                                                            | 2012   | 2013   | 2014   | 2015   | 2016   | 2017   | 2018   |                  |                   |
| 0-3              | No. of deliveries                                          | 78030  | 71966  | 70486  | 61206  | 57216  | 48748  | 37008  | -52.6            | ..                |
|                  | <b>Preterm birth rate (per 100 deliveries)<sup>†</sup></b> |        |        |        |        |        |        |        |                  |                   |
|                  | Very preterm                                               | 1.2%   | 1.3%   | 1.3%   | 1.4%   | 1.5%   | 1.5%   | 1.5%   | 26.7             | <0.0001           |
|                  | Moderate preterm                                           | 1.3%   | 1.3%   | 1.4%   | 1.4%   | 1.4%   | 1.4%   | 1.5%   | 17.7             | <0.0001           |
|                  | Late preterm                                               | 5.3%   | 5.7%   | 5.7%   | 5.8%   | 6.1%   | 6.2%   | 6.0%   | 14.1             | <0.0001           |
|                  | All preterm                                                | 7.8%   | 8.3%   | 8.4%   | 8.6%   | 9.0%   | 9.1%   | 9.1%   | 16.6             | <0.0001           |
|                  | Maternal age $\geq 35$ years                               | 16.2%  | 16.4%  | 15.2%  | 16.2%  | 16.3%  | 21.6%  | 21.2%  | 31.4             | <0.0001           |
|                  | Caesarean                                                  | 38.3%  | 39.4%  | 38.9%  | 37.9%  | 37.5%  | 39.3%  | 39.6%  | 3.5              | 0.14              |
|                  | Antepartum complications                                   | 13.7%  | 16.8%  | 18.0%  | 18.8%  | 19.5%  | 20.5%  | 21.2%  | 54.9             | <0.0001           |
| Medical diseases | 2.2%                                                       | 3.1%   | 3.6%   | 4.5%   | 5.5%   | 6.5%   | 8.2%   | 274.1  | <0.0001          |                   |
| 4-6              | No. of deliveries                                          | 189270 | 185810 | 212570 | 199393 | 228620 | 216344 | 173711 | -8.2             | ..                |
|                  | <b>Preterm birth rate (per 100 deliveries)<sup>†</sup></b> |        |        |        |        |        |        |        |                  |                   |
|                  | Very preterm                                               | 0.5%   | 0.6%   | 0.6%   | 0.6%   | 0.7%   | 0.7%   | 0.8%   | 40.7             | <0.0001           |
|                  | Moderate preterm                                           | 0.7%   | 0.7%   | 0.7%   | 0.8%   | 0.8%   | 0.8%   | 0.9%   | 21.1             | <0.0001           |
|                  | Late preterm                                               | 4.1%   | 4.0%   | 4.1%   | 4.3%   | 4.6%   | 4.7%   | 4.9%   | 18.0             | <0.0001           |
|                  | All preterm                                                | 5.4%   | 5.3%   | 5.5%   | 5.7%   | 6.1%   | 6.2%   | 6.5%   | 20.9             | <0.0001           |
|                  | Maternal age $\geq 35$ years                               | 14.9%  | 15.2%  | 14.2%  | 15.0%  | 15.1%  | 20.5%  | 19.6%  | 31.4             | <0.0001           |
|                  | Caesarean                                                  | 43.2%  | 43.5%  | 43.6%  | 42.9%  | 42.7%  | 43.9%  | 44.3%  | 2.6              | <0.0001           |
|                  | Antepartum complications                                   | 10.9%  | 13.2%  | 14.1%  | 15.1%  | 16.0%  | 17.2%  | 18.5%  | 69.0             | <0.0001           |
| Medical diseases | 2.2%                                                       | 2.7%   | 3.4%   | 4.2%   | 5.0%   | 5.8%   | 6.9%   | 213.1  | <0.0001          |                   |

|                         |                                                            |        |        |        |        |        |        |        |       |         |         |
|-------------------------|------------------------------------------------------------|--------|--------|--------|--------|--------|--------|--------|-------|---------|---------|
| $\geq 7$                | <b>No. of deliveries</b>                                   | 154384 | 175599 | 247808 | 274071 | 379585 | 498547 | 457645 | 196.4 | ..      |         |
|                         | <b>Preterm birth rate (per 100 deliveries)<sup>†</sup></b> |        |        |        |        |        |        |        |       |         |         |
|                         | Very preterm                                               | 0.5%   | 0.5%   | 0.4%   | 0.4%   | 0.4%   | 0.4%   | 0.4%   | 0.4%  | -8.9    | 0.02    |
|                         | Moderate preterm                                           | 0.6%   | 0.6%   | 0.6%   | 0.6%   | 0.5%   | 0.5%   | 0.6%   | 0.6%  | -3.3    | 0.0019  |
|                         | Late preterm                                               | 3.9%   | 3.9%   | 3.9%   | 3.8%   | 3.9%   | 3.9%   | 4.1%   | 4.1%  | 4.6     | 0.0088  |
|                         | All preterm                                                | 4.9%   | 5.0%   | 4.9%   | 4.8%   | 4.8%   | 4.8%   | 5.1%   | 5.1%  | 2.4     | 0.33    |
|                         | <b>Maternal age <math>\geq 35</math> years</b>             | 18.5%  | 19.6%  | 18.4%  | 20.3%  | 21.3%  | 29.8%  | 27.8%  | 27.8% | 50.3    | <0.0001 |
|                         | <b>Caesarean</b>                                           | 50.4%  | 51.2%  | 50.5%  | 49.7%  | 48.8%  | 50.1%  | 50.3%  | 50.3% | -0.2    | <0.0001 |
|                         | <b>Antepartum complications</b>                            | 12.7%  | 15.3%  | 16.0%  | 17.4%  | 17.8%  | 19.0%  | 20.0%  | 20.0% | 57.7    | <0.0001 |
| <b>Medical diseases</b> | 4.3%                                                       | 6.2%   | 7.6%   | 9.2%   | 9.9%   | 11.7%  | 13.5%  | 13.5%  | 213.5 | <0.0001 |         |

Data are percentages of the total number of deliveries unless otherwise stated. Very preterm babies were born after 28–31 completed weeks gestation. Moderate preterm babies were born after 32–33 weeks gestation. Late preterm babies were born after 34–36 weeks gestation.

<sup>†</sup>Adjusted for the sampling distribution of the population.

**Table S9: Changes in preterm birth rates and gestational-age-specific caesarean section rates stratified by obstetric complications in singleton pregnancies in primiparous women aged 25-29 years in China, 2012-18**

| Maternal complications                     | Characteristics                                            | Year  |       |       |       |       |       |       | Change 2012-2018 | p value for trend |
|--------------------------------------------|------------------------------------------------------------|-------|-------|-------|-------|-------|-------|-------|------------------|-------------------|
|                                            |                                                            | 2012  | 2013  | 2014  | 2015  | 2016  | 2017  | 2018  |                  |                   |
| <b>Antepartum complications (n=539144)</b> | <b>No. of deliveries</b>                                   | 55346 | 62559 | 82249 | 72148 | 95006 | 87199 | 84637 | 52.9             | ..                |
|                                            | <b>Caesarean section rate (per 100 deliveries)</b>         |       |       |       |       |       |       |       |                  |                   |
|                                            | 28-31 weeks                                                | 58.7% | 60.1% | 59.1% | 53.8% | 55.1% | 58.8% | 60.1% | 2.5              | 0.35              |
|                                            | 32-33 weeks                                                | 64.4% | 66.3% | 62.9% | 63.7% | 64.7% | 63.6% | 61.4% | -4.6             | 0.04              |
|                                            | 34-36 weeks                                                | 61.8% | 61.7% | 57.1% | 54.2% | 51.7% | 53.0% | 52.9% | -14.4            | <0.0001           |
|                                            | ≥ 37 weeks                                                 | 66.0% | 63.7% | 57.4% | 53.5% | 49.7% | 48.6% | 48.5% | -26.6            | <0.0001           |
|                                            | <b>Preterm birth rate (per 100 deliveries)<sup>†</sup></b> |       |       |       |       |       |       |       |                  |                   |
|                                            | Very preterm                                               | 1.1%  | 1.0%  | 1.0%  | 1.0%  | 1.0%  | 0.9%  | 1.0%  | -8.4             | 0.04              |
|                                            | Moderate preterm                                           | 1.5%  | 1.4%  | 1.3%  | 1.3%  | 1.2%  | 1.3%  | 1.2%  | -18.2            | <0.0001           |
|                                            | Late preterm                                               | 8.6%  | 7.9%  | 7.9%  | 7.8%  | 7.8%  | 7.5%  | 7.6%  | -12.3            | <0.0001           |
| All preterm                                | 11.2%                                                      | 10.3% | 10.1% | 10.0% | 10.1% | 9.7%  | 9.7%  | -12.7 | <0.0001          |                   |
| <b>Medical diseases (n=177751)</b>         | <b>No. of deliveries</b>                                   | 13825 | 18276 | 26109 | 23930 | 32247 | 30773 | 32591 | 135.7            | ..                |
|                                            | <b>Caesarean section rate (per 100 deliveries)</b>         |       |       |       |       |       |       |       |                  |                   |
|                                            | 28-31 weeks                                                | 24.5% | 43.9% | 34.6% | 35.6% | 24.4% | 36.4% | 47.1% | 91.9             | 0.06              |
|                                            | 32-33 weeks                                                | 51.0% | 52.7% | 45.4% | 52.5% | 46.5% | 49.6% | 52.1% | 2.2              | 0.48              |
|                                            | 34-36 weeks                                                | 61.1% | 58.7% | 57.5% | 51.8% | 51.9% | 55.2% | 57.2% | -6.3             | 0.01              |
|                                            | ≥ 37 weeks                                                 | 57.5% | 53.3% | 47.1% | 42.8% | 38.7% | 38.8% | 37.5% | -34.8            | <0.0001           |
|                                            | <b>Preterm birth rate (per 100 deliveries)<sup>†</sup></b> |       |       |       |       |       |       |       |                  |                   |
|                                            | Very preterm                                               | 0.4%  | 0.3%  | 0.4%  | 0.4%  | 0.4%  | 0.4%  | 0.3%  | -12.8            | 0.42              |
| Moderate preterm                           | 0.7%                                                       | 0.7%  | 0.5%  | 0.6%  | 0.6%  | 0.4%  | 0.5%  | -25.0 | 0.0004           |                   |

|  |              |      |      |      |      |      |      |      |       |         |
|--|--------------|------|------|------|------|------|------|------|-------|---------|
|  | Late preterm | 4.8% | 3.9% | 3.6% | 3.7% | 3.6% | 3.3% | 3.4% | -29.6 | <0.0001 |
|  | All preterm  | 5.9% | 4.9% | 4.4% | 4.7% | 4.5% | 4.1% | 4.3% | -27.9 | <0.0001 |

Very preterm babies were born after 28–31 completed weeks gestation. Moderate preterm babies were born after 32–33 weeks gestation. Late preterm babies were born after 34–36 weeks gestation.

<sup>†</sup>Adjusted for the sampling distribution of the population.

**Table S10: Changes in preterm birth rates and gestational-age-specific caesarean section rates stratified by obstetric complications in singleton pregnancies in multiparous women aged 25-29 years in China, 2012-18**

| Maternal complications                     | Characteristics                                            | Year  |       |       |       |       |       |       | Change 2012-2018 | p value for trend |  |
|--------------------------------------------|------------------------------------------------------------|-------|-------|-------|-------|-------|-------|-------|------------------|-------------------|--|
|                                            |                                                            | 2012  | 2013  | 2014  | 2015  | 2016  | 2017  | 2018  |                  |                   |  |
| <b>Antepartum complications (n=193375)</b> | <b>No. of deliveries</b>                                   | 14878 | 18924 | 26119 | 27702 | 36813 | 35672 | 33267 | 123.6            | ..                |  |
|                                            | <b>Caesarean section rate (per 100 deliveries)</b>         |       |       |       |       |       |       |       |                  |                   |  |
|                                            | 28-31 weeks                                                | 53.8% | 57.9% | 55.2% | 55.4% | 60.9% | 59.6% | 66.8% | 24.1             | <0.0001           |  |
|                                            | 32-33 weeks                                                | 69.8% | 69.3% | 67.8% | 69.6% | 68.3% | 69.7% | 70.0% | 0.2              | 0.42              |  |
|                                            | 34-36 weeks                                                | 68.9% | 69.2% | 67.0% | 66.4% | 67.1% | 67.1% | 67.2% | -2.5             | 0.05              |  |
|                                            | ≥ 37 weeks                                                 | 60.3% | 58.5% | 56.1% | 53.5% | 51.0% | 50.1% | 48.4% | -19.8            | <0.0001           |  |
|                                            | <b>Preterm birth rate (per 100 deliveries)<sup>†</sup></b> |       |       |       |       |       |       |       |                  |                   |  |
|                                            | Very preterm                                               | 1.9%  | 1.9%  | 1.8%  | 1.5%  | 1.5%  | 1.5%  | 1.6%  | -15.6            | <0.0001           |  |
|                                            | Moderate preterm                                           | 2.7%  | 2.2%  | 2.3%  | 2.0%  | 2.0%  | 2.0%  | 1.9%  | -27.8            | <0.0001           |  |
|                                            | Late preterm                                               | 10.6% | 10.2% | 10.2% | 9.5%  | 9.9%  | 9.7%  | 9.8%  | -7.5             | <0.0001           |  |
| All preterm                                | 15.1%                                                      | 14.2% | 14.4% | 13.1% | 13.4% | 13.2% | 13.3% | -12.1 | <0.0001          |                   |  |
| <b>Medical diseases (n=75896)</b>          | <b>No. of deliveries</b>                                   | 3696  | 5271  | 8670  | 10478 | 14710 | 15973 | 17098 | 362.6            | ..                |  |
|                                            | <b>Caesarean section rate (per 100 deliveries)</b>         |       |       |       |       |       |       |       |                  |                   |  |
|                                            | 28-31 weeks                                                | 34.5% | 54.6% | 47.4% | 33.3% | 38.1% | 37.5% | 46.0% | 33.3             | 0.47              |  |
|                                            | 32-33 weeks                                                | 52.0% | 57.5% | 52.2% | 49.3% | 50.0% | 55.9% | 55.0% | 5.7              | 0.38              |  |
|                                            | 34-36 weeks                                                | 69.8% | 68.6% | 62.7% | 66.7% | 63.3% | 62.0% | 65.3% | -6.5             | 0.05              |  |
|                                            | ≥ 37 weeks                                                 | 54.7% | 54.2% | 53.8% | 51.4% | 50.9% | 48.9% | 47.5% | -13.3            | <0.0001           |  |
|                                            | <b>Preterm birth rate (per 100 deliveries)<sup>†</sup></b> |       |       |       |       |       |       |       |                  |                   |  |
|                                            | Very preterm                                               | 0.6%  | 0.5%  | 0.4%  | 0.4%  | 0.4%  | 0.3%  | 0.3%  | -44.3            | 0.003             |  |
| Moderate preterm                           | 0.5%                                                       | 0.7%  | 0.7%  | 0.6%  | 0.5%  | 0.6%  | 0.5%  | 1.9   | 0.06             |                   |  |



|  |              |      |      |      |      |      |      |      |       |         |
|--|--------------|------|------|------|------|------|------|------|-------|---------|
|  | Late preterm | 5.1% | 5.6% | 4.3% | 3.9% | 4.0% | 3.9% | 3.7% | -28.2 | <0.0001 |
|  | All preterm  | 6.3% | 6.8% | 5.4% | 5.0% | 4.9% | 4.8% | 4.6% | -27.2 | <0.0001 |

Very preterm babies were born after 28–31 completed weeks gestation. Moderate preterm babies were born after 32–33 weeks gestation. Late preterm babies were born after 34–36 weeks gestation.

<sup>†</sup>Adjusted for the sampling distribution of the population.

**Table S11: Antenatal care in China**

|                                | <b>Service provider</b>          | <b>Service</b>                                                                                                                                                                                                                                                                                                                                                                                                                                                                                                                                                                                                                                                                                                              |
|--------------------------------|----------------------------------|-----------------------------------------------------------------------------------------------------------------------------------------------------------------------------------------------------------------------------------------------------------------------------------------------------------------------------------------------------------------------------------------------------------------------------------------------------------------------------------------------------------------------------------------------------------------------------------------------------------------------------------------------------------------------------------------------------------------------------|
| First trimester (6-13 weeks)   | Primary health care institutions | <ol style="list-style-type: none"> <li>1. health education</li> <li>2. maternal health assessment, including: personal health inquiry, risk-factor screening, general physical examination, measurement of blood pressure, weight, and body mass index (BMI), gynecologic examination</li> <li>3. routine biochemical test and necessary special tests, early pregnancy ultrasound</li> <li>4. health guidance on lifestyle and mental, and nutritional care</li> <li>5. guidance for birth defects prevention</li> <li>6. establishing personal antenatal care records</li> <li>7. immediate transfer to designated hospitals for high-risk pregnant women</li> </ol>                                                      |
| Second trimester (14-27 weeks) | Hospitals                        | <ol style="list-style-type: none"> <li>1. analyzing the results of the first antenatal care visit</li> <li>2. maternal health assessment, including: personal health inquiry, general physical examination, obstetric examination, routine biochemical test and necessary special test, fetal systemic ultrasound screening, fetal growth assessment</li> <li>3. health education, including: prevention of premature delivery, fetal intrauterine monitoring, delivery-related knowledge, breastfeeding, neonatal care, and newborn screening</li> <li>4. prevention and treatment of pregnancy-related diseases</li> <li>5. guidance on health lifestyle, exercise, nutrition, and psychology during pregnancy</li> </ol> |
| Third trimester (28-41 weeks)  | Hospitals                        | <ol style="list-style-type: none"> <li>1. obstetric examination, fetal growth assessment and monitoring</li> <li>2. prevention and treatment of pregnancy-related diseases</li> <li>3. prenatal ultrasound examination, non-stress testing (once a week)</li> <li>4. health education, including: delivery related knowledge, guidance on delivery mode, fetal growth monitoring, breastfeeding, neonatal care, newborn immunization, and guidance on puerperium care</li> </ol>                                                                                                                                                                                                                                            |

**Table S12: Maternal sociodemographic characteristics stratified by frequency of antenatal visits in all pregnancies in China, 2012-18**

| Characteristics              | Number of antenatal visits |               |                |                |                |
|------------------------------|----------------------------|---------------|----------------|----------------|----------------|
|                              | None                       | 1-3           | 4-6            | 7-9            | ≥10            |
| <b>Region</b>                |                            |               |                |                |                |
| East                         | 30524(1.1%)                | 166055(5.9%)  | 578826(20.7%)  | 713359(25.5%)  | 1229598(44.0%) |
| Central                      | 44881(1.2%)                | 250764(6.5%)  | 1434595(37.4%) | 1292401(33.7%) | 714746(18.7%)  |
| West                         | 43156(1.4%)                | 219699(7.3%)  | 792666(26.3%)  | 905655(30.0%)  | 954337(31.6%)  |
| <b>Maternal education</b>    |                            |               |                |                |                |
| Illiterate                   | 3137(6.7%)                 | 10773(23.0%)  | 19176(41.0%)   | 7647(16.3%)    | 4496(9.6%)     |
| Primary school               | 10194(3.6%)                | 52870(18.5%)  | 119870(41.9%)  | 61910(21.6%)   | 33415(11.7%)   |
| Middle school                | 55955(1.8%)                | 332518(10.9%) | 1313159(43.2%) | 830161(27.3%)  | 450046(14.8%)  |
| High school                  | 27198(1.1%)                | 151404(5.8%)  | 836391(32.3%)  | 867595(33.5%)  | 658264(25.4%)  |
| College or higher            | 20517(0.6%)                | 85720(2.5%)   | 504979(14.5%)  | 1100224(31.7%) | 1662315(47.9%) |
| No data                      | 1560(0.8%)                 | 3233(1.6%)    | 12512(6.2%)    | 43878(21.7%)   | 90145(44.5%)   |
| <b>Marital status</b>        |                            |               |                |                |                |
| Married                      | 113557(1.2%)               | 616733(6.5%)  | 2767110(29.1%) | 2875678(30.2%) | 2867802(30.2%) |
| Single, widowed, or divorced | 4977(3.7%)                 | 19689(14.7%)  | 38679(28.9%)   | 35190(26.3%)   | 30193(22.6%)   |
| No data                      | 27(1.5%)                   | 96(5.2%)      | 298(16.0%)     | 547(29.4%)     | 686(36.8%)     |
| <b>Maternal age (years)</b>  |                            |               |                |                |                |
| <20                          | 7345(3.1%)                 | 36913(15.5%)  | 105712(44.3%)  | 56330(23.6%)   | 26402(11.1%)   |
| 20-24                        | 30477(1.7%)                | 166909(9.0%)  | 713639(38.5%)  | 524192(28.3%)  | 370333(20.0%)  |
| 25-29                        | 38269(1.0%)                | 214802(5.5%)  | 1084947(27.6%) | 1219645(31.0%) | 1267200(32.2%) |
| 30-34                        | 21152(0.9%)                | 117280(5.2%)  | 545174(24.0%)  | 707266(31.1%)  | 815149(35.8%)  |
| 35-39                        | 10079(1.2%)                | 53403(6.1%)   | 214662(24.6%)  | 272991(31.3%)  | 290911(33.3%)  |
| 40-44                        | 3096(1.6%)                 | 14661(7.8%)   | 49643(26.3%)   | 57843(30.7%)   | 55737(29.6%)   |
| 45-49                        | 290(2.4%)                  | 1335(11.0%)   | 3571(29.4%)    | 3656(30.1%)    | 2849(23.4%)    |
| No data                      | 7853(2.9%)                 | 31215(11.4%)  | 88739(32.5%)   | 69492(25.5%)   | 70100(25.7%)   |
| <b>Parity</b>                |                            |               |                |                |                |
| Primiparous                  | 52871(1.0%)                | 271045(5.0%)  | 1380309(25.4%) | 1673969(30.8%) | 1913546(35.2%) |
| Multiparous                  | 65547(1.6%)                | 365290(8.7%)  | 1425371(34.0%) | 1236777(29.5%) | 984520(23.5%)  |
| No data                      | 143(1.3%)                  | 183(1.7%)     | 407(3.7%)      | 669(6.1%)      | 615(5.6%)      |
| <b>Type of pregnancy</b>     |                            |               |                |                |                |
| Singleton                    | 116204(1.2%)               | 626780(6.6%)  | 2763135(29.2%) | 2855554(30.1%) | 2847112(30.1%) |
| Multiple                     | 2357(1.4%)                 | 9721(5.7%)    | 42907(25.2%)   | 55821(32.7%)   | 51545(30.2%)   |
| No data                      | 0(0.0%)                    | 17(12.3%)     | 45(32.6%)      | 40(29.0%)      | 24(17.4%)      |

Data are n(%).
